# Supplementary material for: Detecting Brain Structure-Specific Methylation Signatures and Rules for Alzheimer’s Disease
Source: Front Neurosci. 2022 May 2;16:895181. doi: 10.3389/fnins.2022.895181 (PMC9108872; doi:10.3389/fnins.2022.895181)
Supplement: Supplementary Table 3 — Performance of IFS for ERC brain structure. [file Table_3.XLSX]

## Sheet: PART
Number features	SN	SP	ACC	MCC	Precision	F1-measure
1	0.95	0.918367	0.927536	0.835745	0.826087	0.883721
2	1	0.959184	0.971014	0.933801	0.909091	0.952381
3	1	0.959184	0.971014	0.933801	0.909091	0.952381
4	0.95	0.918367	0.927536	0.835745	0.826087	0.883721
5	0.85	0.897959	0.884058	0.728166	0.772727	0.809524
6	0.85	0.897959	0.884058	0.728166	0.772727	0.809524
7	0.85	0.897959	0.884058	0.728166	0.772727	0.809524
8	0.8	0.877551	0.855072	0.659621	0.727273	0.761905
9	0.8	0.877551	0.855072	0.659621	0.727273	0.761905
10	0.8	0.877551	0.855072	0.659621	0.727273	0.761905
11	0.9	0.897959	0.898551	0.767982	0.782609	0.837209
12	0.9	0.938776	0.927536	0.827044	0.857143	0.878049
13	0.9	0.938776	0.927536	0.827044	0.857143	0.878049
14	0.9	0.938776	0.927536	0.827044	0.857143	0.878049
15	0.9	0.938776	0.927536	0.827044	0.857143	0.878049
16	0.95	0.938776	0.942029	0.865256	0.863636	0.904762
17	0.95	0.938776	0.942029	0.865256	0.863636	0.904762
18	0.95	0.938776	0.942029	0.865256	0.863636	0.904762
19	0.95	0.938776	0.942029	0.865256	0.863636	0.904762
20	0.95	0.938776	0.942029	0.865256	0.863636	0.904762
21	0.95	0.938776	0.942029	0.865256	0.863636	0.904762
22	0.9	0.959184	0.942029	0.859184	0.9	0.9
23	0.9	0.959184	0.942029	0.859184	0.9	0.9
24	0.9	0.959184	0.942029	0.859184	0.9	0.9
25	0.9	0.959184	0.942029	0.859184	0.9	0.9
26	0.9	0.959184	0.942029	0.859184	0.9	0.9
27	0.9	0.959184	0.942029	0.859184	0.9	0.9
28	0.9	0.959184	0.942029	0.859184	0.9	0.9
29	0.9	0.959184	0.942029	0.859184	0.9	0.9
30	0.9	0.959184	0.942029	0.859184	0.9	0.9
31	0.9	0.959184	0.942029	0.859184	0.9	0.9
32	0.9	0.959184	0.942029	0.859184	0.9	0.9
33	0.9	0.959184	0.942029	0.859184	0.9	0.9
34	0.9	0.959184	0.942029	0.859184	0.9	0.9
35	0.9	0.938776	0.927536	0.827044	0.857143	0.878049
36	0.9	0.938776	0.927536	0.827044	0.857143	0.878049
37	0.9	0.938776	0.927536	0.827044	0.857143	0.878049
38	0.9	0.938776	0.927536	0.827044	0.857143	0.878049
39	0.9	0.938776	0.927536	0.827044	0.857143	0.878049
40	0.9	0.938776	0.927536	0.827044	0.857143	0.878049
41	0.9	0.938776	0.927536	0.827044	0.857143	0.878049
42	0.9	0.938776	0.927536	0.827044	0.857143	0.878049
43	0.9	0.938776	0.927536	0.827044	0.857143	0.878049
44	0.9	0.938776	0.927536	0.827044	0.857143	0.878049
45	0.9	0.938776	0.927536	0.827044	0.857143	0.878049
46	0.9	0.938776	0.927536	0.827044	0.857143	0.878049
47	0.9	0.938776	0.927536	0.827044	0.857143	0.878049
48	0.9	0.938776	0.927536	0.827044	0.857143	0.878049
49	0.9	0.938776	0.927536	0.827044	0.857143	0.878049
50	0.9	0.938776	0.927536	0.827044	0.857143	0.878049
51	0.9	0.938776	0.927536	0.827044	0.857143	0.878049
52	0.95	0.918367	0.927536	0.835745	0.826087	0.883721
53	0.95	0.918367	0.927536	0.835745	0.826087	0.883721
54	0.95	0.918367	0.927536	0.835745	0.826087	0.883721
55	0.95	0.918367	0.927536	0.835745	0.826087	0.883721
56	0.95	0.918367	0.927536	0.835745	0.826087	0.883721
57	0.95	0.918367	0.927536	0.835745	0.826087	0.883721
58	0.95	0.918367	0.927536	0.835745	0.826087	0.883721
59	0.95	0.918367	0.927536	0.835745	0.826087	0.883721
60	0.95	0.918367	0.927536	0.835745	0.826087	0.883721
61	0.9	0.979592	0.956522	0.893372	0.947368	0.923077
62	0.9	0.979592	0.956522	0.893372	0.947368	0.923077
63	0.9	0.979592	0.956522	0.893372	0.947368	0.923077
64	0.9	0.979592	0.956522	0.893372	0.947368	0.923077
65	0.9	0.979592	0.956522	0.893372	0.947368	0.923077
66	0.9	0.979592	0.956522	0.893372	0.947368	0.923077
67	0.9	0.979592	0.956522	0.893372	0.947368	0.923077
68	0.9	0.979592	0.956522	0.893372	0.947368	0.923077
69	0.9	0.979592	0.956522	0.893372	0.947368	0.923077
70	0.9	0.979592	0.956522	0.893372	0.947368	0.923077
71	0.9	0.979592	0.956522	0.893372	0.947368	0.923077
72	0.9	0.979592	0.956522	0.893372	0.947368	0.923077
73	0.9	0.979592	0.956522	0.893372	0.947368	0.923077
74	0.9	0.979592	0.956522	0.893372	0.947368	0.923077
75	0.9	0.979592	0.956522	0.893372	0.947368	0.923077
76	0.9	0.979592	0.956522	0.893372	0.947368	0.923077
77	0.9	0.979592	0.956522	0.893372	0.947368	0.923077
78	0.9	0.979592	0.956522	0.893372	0.947368	0.923077
79	0.9	0.979592	0.956522	0.893372	0.947368	0.923077
80	0.9	0.979592	0.956522	0.893372	0.947368	0.923077
81	0.9	0.979592	0.956522	0.893372	0.947368	0.923077
82	0.9	0.979592	0.956522	0.893372	0.947368	0.923077
83	0.9	0.979592	0.956522	0.893372	0.947368	0.923077
84	0.9	0.979592	0.956522	0.893372	0.947368	0.923077
85	0.9	0.979592	0.956522	0.893372	0.947368	0.923077
86	0.85	0.979592	0.942029	0.857149	0.944444	0.894737
87	0.85	0.979592	0.942029	0.857149	0.944444	0.894737
88	0.85	0.979592	0.942029	0.857149	0.944444	0.894737
89	0.85	0.979592	0.942029	0.857149	0.944444	0.894737
90	0.85	0.979592	0.942029	0.857149	0.944444	0.894737
91	0.85	0.979592	0.942029	0.857149	0.944444	0.894737
92	0.85	0.979592	0.942029	0.857149	0.944444	0.894737
93	0.85	0.979592	0.942029	0.857149	0.944444	0.894737
94	0.85	0.979592	0.942029	0.857149	0.944444	0.894737
95	0.85	0.979592	0.942029	0.857149	0.944444	0.894737
96	0.85	0.979592	0.942029	0.857149	0.944444	0.894737
97	0.85	0.979592	0.942029	0.857149	0.944444	0.894737
98	0.85	0.979592	0.942029	0.857149	0.944444	0.894737
99	0.85	0.979592	0.942029	0.857149	0.944444	0.894737
100	0.85	0.979592	0.942029	0.857149	0.944444	0.894737
101	0.85	0.979592	0.942029	0.857149	0.944444	0.894737
102	0.85	0.979592	0.942029	0.857149	0.944444	0.894737
103	0.85	0.979592	0.942029	0.857149	0.944444	0.894737
104	0.85	0.979592	0.942029	0.857149	0.944444	0.894737
105	0.85	0.979592	0.942029	0.857149	0.944444	0.894737
106	0.85	0.979592	0.942029	0.857149	0.944444	0.894737
107	0.85	0.979592	0.942029	0.857149	0.944444	0.894737
108	0.85	0.979592	0.942029	0.857149	0.944444	0.894737
109	0.85	0.979592	0.942029	0.857149	0.944444	0.894737
110	0.85	0.979592	0.942029	0.857149	0.944444	0.894737
111	0.85	0.979592	0.942029	0.857149	0.944444	0.894737
112	0.85	0.979592	0.942029	0.857149	0.944444	0.894737
113	0.85	0.979592	0.942029	0.857149	0.944444	0.894737
114	0.85	0.959184	0.927536	0.821861	0.894737	0.871795
115	0.85	0.959184	0.927536	0.821861	0.894737	0.871795
116	0.85	0.959184	0.927536	0.821861	0.894737	0.871795
117	0.85	0.959184	0.927536	0.821861	0.894737	0.871795
118	0.85	0.959184	0.927536	0.821861	0.894737	0.871795
119	0.85	0.959184	0.927536	0.821861	0.894737	0.871795
120	0.85	0.959184	0.927536	0.821861	0.894737	0.871795
121	0.85	0.959184	0.927536	0.821861	0.894737	0.871795
122	0.85	0.959184	0.927536	0.821861	0.894737	0.871795
123	0.85	0.959184	0.927536	0.821861	0.894737	0.871795
124	0.85	0.959184	0.927536	0.821861	0.894737	0.871795
125	0.85	0.959184	0.927536	0.821861	0.894737	0.871795
126	0.85	0.959184	0.927536	0.821861	0.894737	0.871795
127	0.85	0.959184	0.927536	0.821861	0.894737	0.871795
128	0.85	0.959184	0.927536	0.821861	0.894737	0.871795
129	0.85	0.959184	0.927536	0.821861	0.894737	0.871795
130	0.85	0.959184	0.927536	0.821861	0.894737	0.871795
131	0.85	0.959184	0.927536	0.821861	0.894737	0.871795
132	0.85	0.959184	0.927536	0.821861	0.894737	0.871795
133	0.85	0.959184	0.927536	0.821861	0.894737	0.871795
134	0.85	0.959184	0.927536	0.821861	0.894737	0.871795
135	0.85	0.959184	0.927536	0.821861	0.894737	0.871795
136	0.85	0.959184	0.927536	0.821861	0.894737	0.871795
137	0.85	0.959184	0.927536	0.821861	0.894737	0.871795
138	0.85	0.959184	0.927536	0.821861	0.894737	0.871795
139	0.85	0.959184	0.927536	0.821861	0.894737	0.871795
140	0.85	0.959184	0.927536	0.821861	0.894737	0.871795
141	0.85	0.959184	0.927536	0.821861	0.894737	0.871795
142	0.85	0.959184	0.927536	0.821861	0.894737	0.871795
143	0.85	0.959184	0.927536	0.821861	0.894737	0.871795
144	0.85	0.959184	0.927536	0.821861	0.894737	0.871795
145	0.85	0.959184	0.927536	0.821861	0.894737	0.871795
146	0.85	0.959184	0.927536	0.821861	0.894737	0.871795
147	0.85	0.959184	0.927536	0.821861	0.894737	0.871795
148	0.85	0.959184	0.927536	0.821861	0.894737	0.871795
149	0.85	0.959184	0.927536	0.821861	0.894737	0.871795
150	0.85	0.959184	0.927536	0.821861	0.894737	0.871795
151	0.85	0.959184	0.927536	0.821861	0.894737	0.871795
152	0.85	0.959184	0.927536	0.821861	0.894737	0.871795
153	0.85	0.959184	0.927536	0.821861	0.894737	0.871795
154	0.85	0.959184	0.927536	0.821861	0.894737	0.871795
155	0.85	0.959184	0.927536	0.821861	0.894737	0.871795
156	0.85	0.959184	0.927536	0.821861	0.894737	0.871795
157	0.85	0.959184	0.927536	0.821861	0.894737	0.871795
158	0.85	0.959184	0.927536	0.821861	0.894737	0.871795

## Sheet: RF
Number of features	SN	SP	ACC	MCC	Precision	F1-measure
1	1	0.979592	0.985507	0.965891	0.952381	0.97561
2	1	0.959184	0.971014	0.933801	0.909091	0.952381
3	1	0.959184	0.971014	0.933801	0.909091	0.952381
4	1	0.959184	0.971014	0.933801	0.909091	0.952381
5	1	0.959184	0.971014	0.933801	0.909091	0.952381
6	1	0.959184	0.971014	0.933801	0.909091	0.952381
7	0.95	0.959184	0.956522	0.896467	0.904762	0.926829
8	1	0.938776	0.956522	0.903508	0.869565	0.930233
9	0.95	0.938776	0.942029	0.865256	0.863636	0.904762
10	1	0.938776	0.956522	0.903508	0.869565	0.930233
11	1	0.938776	0.956522	0.903508	0.869565	0.930233
12	1	0.959184	0.971014	0.933801	0.909091	0.952381
13	1	0.959184	0.971014	0.933801	0.909091	0.952381
14	1	0.959184	0.971014	0.933801	0.909091	0.952381
15	1	0.959184	0.971014	0.933801	0.909091	0.952381
16	1	0.959184	0.971014	0.933801	0.909091	0.952381
17	1	0.959184	0.971014	0.933801	0.909091	0.952381
18	1	0.959184	0.971014	0.933801	0.909091	0.952381
19	1	0.959184	0.971014	0.933801	0.909091	0.952381
20	1	0.959184	0.971014	0.933801	0.909091	0.952381
21	1	0.959184	0.971014	0.933801	0.909091	0.952381
22	1	0.959184	0.971014	0.933801	0.909091	0.952381
23	1	0.959184	0.971014	0.933801	0.909091	0.952381
24	1	0.959184	0.971014	0.933801	0.909091	0.952381
25	1	0.959184	0.971014	0.933801	0.909091	0.952381
26	1	0.959184	0.971014	0.933801	0.909091	0.952381
27	1	0.959184	0.971014	0.933801	0.909091	0.952381
28	1	0.959184	0.971014	0.933801	0.909091	0.952381
29	1	0.959184	0.971014	0.933801	0.909091	0.952381
30	1	0.959184	0.971014	0.933801	0.909091	0.952381
31	1	0.959184	0.971014	0.933801	0.909091	0.952381
32	1	0.959184	0.971014	0.933801	0.909091	0.952381
33	1	0.959184	0.971014	0.933801	0.909091	0.952381
34	1	0.959184	0.971014	0.933801	0.909091	0.952381
35	1	0.959184	0.971014	0.933801	0.909091	0.952381
36	1	0.959184	0.971014	0.933801	0.909091	0.952381
37	1	0.959184	0.971014	0.933801	0.909091	0.952381
38	1	0.959184	0.971014	0.933801	0.909091	0.952381
39	1	0.959184	0.971014	0.933801	0.909091	0.952381
40	1	0.959184	0.971014	0.933801	0.909091	0.952381
41	1	0.959184	0.971014	0.933801	0.909091	0.952381
42	1	0.959184	0.971014	0.933801	0.909091	0.952381
43	1	0.938776	0.956522	0.903508	0.869565	0.930233
44	1	0.959184	0.971014	0.933801	0.909091	0.952381
45	1	0.959184	0.971014	0.933801	0.909091	0.952381
46	1	0.959184	0.971014	0.933801	0.909091	0.952381
47	1	0.959184	0.971014	0.933801	0.909091	0.952381
48	1	0.959184	0.971014	0.933801	0.909091	0.952381
49	1	0.938776	0.956522	0.903508	0.869565	0.930233
50	1	0.959184	0.971014	0.933801	0.909091	0.952381
51	1	0.959184	0.971014	0.933801	0.909091	0.952381
52	1	0.959184	0.971014	0.933801	0.909091	0.952381
53	1	0.938776	0.956522	0.903508	0.869565	0.930233
54	1	0.959184	0.971014	0.933801	0.909091	0.952381
55	1	0.938776	0.956522	0.903508	0.869565	0.930233
56	1	0.938776	0.956522	0.903508	0.869565	0.930233
57	1	0.938776	0.956522	0.903508	0.869565	0.930233
58	1	0.938776	0.956522	0.903508	0.869565	0.930233
59	1	0.959184	0.971014	0.933801	0.909091	0.952381
60	0.95	0.938776	0.942029	0.865256	0.863636	0.904762
61	1	0.938776	0.956522	0.903508	0.869565	0.930233
62	1	0.938776	0.956522	0.903508	0.869565	0.930233
63	1	0.938776	0.956522	0.903508	0.869565	0.930233
64	1	0.938776	0.956522	0.903508	0.869565	0.930233
65	1	0.938776	0.956522	0.903508	0.869565	0.930233
66	1	0.938776	0.956522	0.903508	0.869565	0.930233
67	1	0.938776	0.956522	0.903508	0.869565	0.930233
68	1	0.938776	0.956522	0.903508	0.869565	0.930233
69	1	0.959184	0.971014	0.933801	0.909091	0.952381
70	0.95	0.938776	0.942029	0.865256	0.863636	0.904762
71	0.95	0.938776	0.942029	0.865256	0.863636	0.904762
72	1	0.938776	0.956522	0.903508	0.869565	0.930233
73	1	0.938776	0.956522	0.903508	0.869565	0.930233
74	1	0.938776	0.956522	0.903508	0.869565	0.930233
75	1	0.938776	0.956522	0.903508	0.869565	0.930233
76	1	0.938776	0.956522	0.903508	0.869565	0.930233
77	1	0.938776	0.956522	0.903508	0.869565	0.930233
78	1	0.938776	0.956522	0.903508	0.869565	0.930233
79	1	0.938776	0.956522	0.903508	0.869565	0.930233
80	0.95	0.938776	0.942029	0.865256	0.863636	0.904762
81	1	0.938776	0.956522	0.903508	0.869565	0.930233
82	1	0.959184	0.971014	0.933801	0.909091	0.952381
83	1	0.938776	0.956522	0.903508	0.869565	0.930233
84	1	0.938776	0.956522	0.903508	0.869565	0.930233
85	1	0.938776	0.956522	0.903508	0.869565	0.930233
86	1	0.938776	0.956522	0.903508	0.869565	0.930233
87	1	0.959184	0.971014	0.933801	0.909091	0.952381
88	0.95	0.959184	0.956522	0.896467	0.904762	0.926829
89	1	0.938776	0.956522	0.903508	0.869565	0.930233
90	0.95	0.938776	0.942029	0.865256	0.863636	0.904762
91	0.95	0.959184	0.956522	0.896467	0.904762	0.926829
92	1	0.959184	0.971014	0.933801	0.909091	0.952381
93	1	0.959184	0.971014	0.933801	0.909091	0.952381
94	0.95	0.959184	0.956522	0.896467	0.904762	0.926829
95	1	0.918367	0.942029	0.874818	0.833333	0.909091
96	0.95	0.938776	0.942029	0.865256	0.863636	0.904762
97	0.95	0.938776	0.942029	0.865256	0.863636	0.904762
98	0.95	0.938776	0.942029	0.865256	0.863636	0.904762
99	1	0.938776	0.956522	0.903508	0.869565	0.930233
100	0.95	0.959184	0.956522	0.896467	0.904762	0.926829
101	0.95	0.938776	0.942029	0.865256	0.863636	0.904762
102	1	0.959184	0.971014	0.933801	0.909091	0.952381
103	0.95	0.959184	0.956522	0.896467	0.904762	0.926829
104	1	0.959184	0.971014	0.933801	0.909091	0.952381
105	0.95	0.959184	0.956522	0.896467	0.904762	0.926829
106	0.95	0.938776	0.942029	0.865256	0.863636	0.904762
107	0.95	0.918367	0.927536	0.835745	0.826087	0.883721
108	1	0.959184	0.971014	0.933801	0.909091	0.952381
109	0.95	0.938776	0.942029	0.865256	0.863636	0.904762
110	1	0.918367	0.942029	0.874818	0.833333	0.909091
111	0.95	0.918367	0.927536	0.835745	0.826087	0.883721
112	1	0.918367	0.942029	0.874818	0.833333	0.909091
113	1	0.918367	0.942029	0.874818	0.833333	0.909091
114	0.95	0.938776	0.942029	0.865256	0.863636	0.904762
115	0.95	0.938776	0.942029	0.865256	0.863636	0.904762
116	0.95	0.938776	0.942029	0.865256	0.863636	0.904762
117	1	0.938776	0.956522	0.903508	0.869565	0.930233
118	0.95	0.918367	0.927536	0.835745	0.826087	0.883721
119	0.95	0.938776	0.942029	0.865256	0.863636	0.904762
120	1	0.938776	0.956522	0.903508	0.869565	0.930233
121	1	0.938776	0.956522	0.903508	0.869565	0.930233
122	0.95	0.938776	0.942029	0.865256	0.863636	0.904762
123	0.95	0.938776	0.942029	0.865256	0.863636	0.904762
124	0.95	0.959184	0.956522	0.896467	0.904762	0.926829
125	0.95	0.959184	0.956522	0.896467	0.904762	0.926829
126	0.95	0.938776	0.942029	0.865256	0.863636	0.904762
127	0.95	0.938776	0.942029	0.865256	0.863636	0.904762
128	1	0.918367	0.942029	0.874818	0.833333	0.909091
129	0.95	0.938776	0.942029	0.865256	0.863636	0.904762
130	0.95	0.918367	0.927536	0.835745	0.826087	0.883721
131	1	0.918367	0.942029	0.874818	0.833333	0.909091
132	0.95	0.938776	0.942029	0.865256	0.863636	0.904762
133	0.95	0.938776	0.942029	0.865256	0.863636	0.904762
134	0.95	0.918367	0.927536	0.835745	0.826087	0.883721
135	0.95	0.938776	0.942029	0.865256	0.863636	0.904762
136	1	0.938776	0.956522	0.903508	0.869565	0.930233
137	0.95	0.938776	0.942029	0.865256	0.863636	0.904762
138	0.95	0.918367	0.927536	0.835745	0.826087	0.883721
139	0.95	0.959184	0.956522	0.896467	0.904762	0.926829
140	0.95	0.918367	0.927536	0.835745	0.826087	0.883721
141	0.95	0.938776	0.942029	0.865256	0.863636	0.904762
142	1	0.918367	0.942029	0.874818	0.833333	0.909091
143	1	0.938776	0.956522	0.903508	0.869565	0.930233
144	0.95	0.918367	0.927536	0.835745	0.826087	0.883721
145	0.95	0.918367	0.927536	0.835745	0.826087	0.883721
146	0.95	0.938776	0.942029	0.865256	0.863636	0.904762
147	0.95	0.938776	0.942029	0.865256	0.863636	0.904762
148	0.95	0.918367	0.927536	0.835745	0.826087	0.883721
149	0.95	0.938776	0.942029	0.865256	0.863636	0.904762
150	0.95	0.938776	0.942029	0.865256	0.863636	0.904762
151	0.95	0.918367	0.927536	0.835745	0.826087	0.883721
152	0.95	0.918367	0.927536	0.835745	0.826087	0.883721
153	0.95	0.918367	0.927536	0.835745	0.826087	0.883721
154	0.95	0.918367	0.927536	0.835745	0.826087	0.883721
155	0.95	0.918367	0.927536	0.835745	0.826087	0.883721
156	0.95	0.918367	0.927536	0.835745	0.826087	0.883721
157	0.95	0.938776	0.942029	0.865256	0.863636	0.904762
158	0.95	0.918367	0.927536	0.835745	0.826087	0.883721

## Sheet: SMO
Number of features	SN	SP	ACC	MCC	Precision	F1-measure
1	1	0.877551	0.913043	0.821608	0.769231	0.869565
2	1	0.877551	0.913043	0.821608	0.769231	0.869565
3	1	0.918367	0.942029	0.874818	0.833333	0.909091
4	1	0.979592	0.985507	0.965891	0.952381	0.97561
5	1	0.918367	0.942029	0.874818	0.833333	0.909091
6	1	0.918367	0.942029	0.874818	0.833333	0.909091
7	1	0.959184	0.971014	0.933801	0.909091	0.952381
8	1	0.938776	0.956522	0.903508	0.869565	0.930233
9	1	0.938776	0.956522	0.903508	0.869565	0.930233
10	1	0.938776	0.956522	0.903508	0.869565	0.930233
11	1	0.959184	0.971014	0.933801	0.909091	0.952381
12	1	0.959184	0.971014	0.933801	0.909091	0.952381
13	1	0.959184	0.971014	0.933801	0.909091	0.952381
14	1	0.959184	0.971014	0.933801	0.909091	0.952381
15	1	0.979592	0.985507	0.965891	0.952381	0.97561
16	1	0.979592	0.985507	0.965891	0.952381	0.97561
17	0.95	0.979592	0.971014	0.929592	0.95	0.95
18	1	0.979592	0.985507	0.965891	0.952381	0.97561
19	1	0.979592	0.985507	0.965891	0.952381	0.97561
20	1	0.979592	0.985507	0.965891	0.952381	0.97561
21	0.95	0.979592	0.971014	0.929592	0.95	0.95
22	1	0.979592	0.985507	0.965891	0.952381	0.97561
23	1	0.979592	0.985507	0.965891	0.952381	0.97561
24	1	0.979592	0.985507	0.965891	0.952381	0.97561
25	1	0.979592	0.985507	0.965891	0.952381	0.97561
26	1	0.979592	0.985507	0.965891	0.952381	0.97561
27	0.95	0.979592	0.971014	0.929592	0.95	0.95
28	0.95	0.979592	0.971014	0.929592	0.95	0.95
29	1	0.979592	0.985507	0.965891	0.952381	0.97561
30	0.95	0.979592	0.971014	0.929592	0.95	0.95
31	0.95	0.979592	0.971014	0.929592	0.95	0.95
32	0.95	0.979592	0.971014	0.929592	0.95	0.95
33	0.95	0.979592	0.971014	0.929592	0.95	0.95
34	0.95	0.979592	0.971014	0.929592	0.95	0.95
35	0.95	0.979592	0.971014	0.929592	0.95	0.95
36	0.95	0.979592	0.971014	0.929592	0.95	0.95
37	0.95	0.979592	0.971014	0.929592	0.95	0.95
38	0.95	0.979592	0.971014	0.929592	0.95	0.95
39	0.95	0.979592	0.971014	0.929592	0.95	0.95
40	0.95	0.979592	0.971014	0.929592	0.95	0.95
41	0.95	0.979592	0.971014	0.929592	0.95	0.95
42	0.95	0.979592	0.971014	0.929592	0.95	0.95
43	0.95	0.979592	0.971014	0.929592	0.95	0.95
44	0.95	0.979592	0.971014	0.929592	0.95	0.95
45	1	0.979592	0.985507	0.965891	0.952381	0.97561
46	1	0.979592	0.985507	0.965891	0.952381	0.97561
47	1	0.979592	0.985507	0.965891	0.952381	0.97561
48	1	0.979592	0.985507	0.965891	0.952381	0.97561
49	0.95	0.979592	0.971014	0.929592	0.95	0.95
50	0.95	0.979592	0.971014	0.929592	0.95	0.95
51	0.95	0.979592	0.971014	0.929592	0.95	0.95
52	1	0.979592	0.985507	0.965891	0.952381	0.97561
53	0.95	0.979592	0.971014	0.929592	0.95	0.95
54	0.95	0.979592	0.971014	0.929592	0.95	0.95
55	0.95	0.979592	0.971014	0.929592	0.95	0.95
56	0.95	0.979592	0.971014	0.929592	0.95	0.95
57	0.95	0.979592	0.971014	0.929592	0.95	0.95
58	0.95	0.979592	0.971014	0.929592	0.95	0.95
59	0.95	0.979592	0.971014	0.929592	0.95	0.95
60	0.95	0.959184	0.956522	0.896467	0.904762	0.926829
61	1	0.959184	0.971014	0.933801	0.909091	0.952381
62	1	0.959184	0.971014	0.933801	0.909091	0.952381
63	1	0.959184	0.971014	0.933801	0.909091	0.952381
64	1	0.959184	0.971014	0.933801	0.909091	0.952381
65	0.95	0.959184	0.956522	0.896467	0.904762	0.926829
66	0.95	0.959184	0.956522	0.896467	0.904762	0.926829
67	0.95	0.959184	0.956522	0.896467	0.904762	0.926829
68	1	0.959184	0.971014	0.933801	0.909091	0.952381
69	0.95	0.959184	0.956522	0.896467	0.904762	0.926829
70	0.95	0.959184	0.956522	0.896467	0.904762	0.926829
71	0.95	0.959184	0.956522	0.896467	0.904762	0.926829
72	0.95	0.959184	0.956522	0.896467	0.904762	0.926829
73	0.95	0.959184	0.956522	0.896467	0.904762	0.926829
74	0.95	0.959184	0.956522	0.896467	0.904762	0.926829
75	0.95	0.959184	0.956522	0.896467	0.904762	0.926829
76	0.95	0.959184	0.956522	0.896467	0.904762	0.926829
77	0.95	0.959184	0.956522	0.896467	0.904762	0.926829
78	0.95	0.938776	0.942029	0.865256	0.863636	0.904762
79	0.95	0.938776	0.942029	0.865256	0.863636	0.904762
80	0.95	0.938776	0.942029	0.865256	0.863636	0.904762
81	1	0.938776	0.956522	0.903508	0.869565	0.930233
82	1	0.938776	0.956522	0.903508	0.869565	0.930233
83	1	0.938776	0.956522	0.903508	0.869565	0.930233
84	0.95	0.938776	0.942029	0.865256	0.863636	0.904762
85	0.95	0.938776	0.942029	0.865256	0.863636	0.904762
86	0.95	0.938776	0.942029	0.865256	0.863636	0.904762
87	0.95	0.938776	0.942029	0.865256	0.863636	0.904762
88	0.95	0.938776	0.942029	0.865256	0.863636	0.904762
89	0.95	0.938776	0.942029	0.865256	0.863636	0.904762
90	0.95	0.938776	0.942029	0.865256	0.863636	0.904762
91	0.95	0.938776	0.942029	0.865256	0.863636	0.904762
92	0.95	0.938776	0.942029	0.865256	0.863636	0.904762
93	0.95	0.938776	0.942029	0.865256	0.863636	0.904762
94	0.95	0.938776	0.942029	0.865256	0.863636	0.904762
95	0.95	0.938776	0.942029	0.865256	0.863636	0.904762
96	0.95	0.938776	0.942029	0.865256	0.863636	0.904762
97	0.95	0.938776	0.942029	0.865256	0.863636	0.904762
98	0.95	0.938776	0.942029	0.865256	0.863636	0.904762
99	0.95	0.938776	0.942029	0.865256	0.863636	0.904762
100	0.95	0.938776	0.942029	0.865256	0.863636	0.904762
101	0.95	0.938776	0.942029	0.865256	0.863636	0.904762
102	0.95	0.938776	0.942029	0.865256	0.863636	0.904762
103	0.95	0.938776	0.942029	0.865256	0.863636	0.904762
104	0.95	0.938776	0.942029	0.865256	0.863636	0.904762
105	0.95	0.938776	0.942029	0.865256	0.863636	0.904762
106	0.95	0.938776	0.942029	0.865256	0.863636	0.904762
107	0.95	0.959184	0.956522	0.896467	0.904762	0.926829
108	0.95	0.959184	0.956522	0.896467	0.904762	0.926829
109	0.95	0.959184	0.956522	0.896467	0.904762	0.926829
110	0.95	0.959184	0.956522	0.896467	0.904762	0.926829
111	0.95	0.959184	0.956522	0.896467	0.904762	0.926829
112	0.95	0.959184	0.956522	0.896467	0.904762	0.926829
113	0.95	0.959184	0.956522	0.896467	0.904762	0.926829
114	0.95	0.959184	0.956522	0.896467	0.904762	0.926829
115	0.95	0.959184	0.956522	0.896467	0.904762	0.926829
116	0.95	0.959184	0.956522	0.896467	0.904762	0.926829
117	0.95	0.959184	0.956522	0.896467	0.904762	0.926829
118	0.95	0.959184	0.956522	0.896467	0.904762	0.926829
119	0.95	0.959184	0.956522	0.896467	0.904762	0.926829
120	0.95	0.959184	0.956522	0.896467	0.904762	0.926829
121	0.95	0.959184	0.956522	0.896467	0.904762	0.926829
122	0.95	0.959184	0.956522	0.896467	0.904762	0.926829
123	0.95	0.959184	0.956522	0.896467	0.904762	0.926829
124	0.95	0.959184	0.956522	0.896467	0.904762	0.926829
125	0.95	0.959184	0.956522	0.896467	0.904762	0.926829
126	0.95	0.959184	0.956522	0.896467	0.904762	0.926829
127	0.95	0.979592	0.971014	0.929592	0.95	0.95
128	0.95	0.959184	0.956522	0.896467	0.904762	0.926829
129	0.95	0.959184	0.956522	0.896467	0.904762	0.926829
130	0.95	0.959184	0.956522	0.896467	0.904762	0.926829
131	0.95	0.979592	0.971014	0.929592	0.95	0.95
132	0.95	0.979592	0.971014	0.929592	0.95	0.95
133	0.95	0.979592	0.971014	0.929592	0.95	0.95
134	0.95	0.979592	0.971014	0.929592	0.95	0.95
135	0.95	0.979592	0.971014	0.929592	0.95	0.95
136	0.95	0.979592	0.971014	0.929592	0.95	0.95
137	0.95	0.979592	0.971014	0.929592	0.95	0.95
138	0.95	0.979592	0.971014	0.929592	0.95	0.95
139	0.95	0.979592	0.971014	0.929592	0.95	0.95
140	0.95	0.979592	0.971014	0.929592	0.95	0.95
141	0.95	0.959184	0.956522	0.896467	0.904762	0.926829
142	0.95	0.959184	0.956522	0.896467	0.904762	0.926829
143	0.95	0.959184	0.956522	0.896467	0.904762	0.926829
144	0.95	0.959184	0.956522	0.896467	0.904762	0.926829
145	0.95	0.959184	0.956522	0.896467	0.904762	0.926829
146	0.95	0.959184	0.956522	0.896467	0.904762	0.926829
147	0.95	0.959184	0.956522	0.896467	0.904762	0.926829
148	0.95	0.979592	0.971014	0.929592	0.95	0.95
149	0.95	0.959184	0.956522	0.896467	0.904762	0.926829
150	0.95	0.979592	0.971014	0.929592	0.95	0.95
151	0.95	0.959184	0.956522	0.896467	0.904762	0.926829
152	0.95	0.959184	0.956522	0.896467	0.904762	0.926829
153	0.95	0.979592	0.971014	0.929592	0.95	0.95
154	0.95	0.979592	0.971014	0.929592	0.95	0.95
155	0.95	0.979592	0.971014	0.929592	0.95	0.95
156	0.95	0.979592	0.971014	0.929592	0.95	0.95
157	0.95	0.979592	0.971014	0.929592	0.95	0.95
158	0.95	0.979592	0.971014	0.929592	0.95	0.95
